# Supplementary material for: Near-Infrared-Triggered Photodynamic Therapy toward Breast Cancer Cells Using Dendrimer-Functionalized Upconversion Nanoparticles
Source: Nanomaterials (Basel). 2017 Sep 11;7(9):269. doi: 10.3390/nano7090269 (PMC5618380; doi:10.3390/nano7090269)
Supplement: Supplementary file 1 [file nanomaterials-07-00269-s001.docx]

**Supporting information**

**Near-infrared-triggered photodynamic therapy toward breast cancer cells using dendrimer-functionalized upconversion nanoparticles**

Bing-Yen Wang 1,2,3,4, Ming-Liang Liao 5, Guan-Ci Hong 6, Wen-Wei Chang 6,*,and

Chih-Chien Chu 5,7,*

1 Division of Thoracic Surgery, Department of Surgery, Changhua Christian Hospital and Chung Shan Medical University, Taichung, Taiwan; [156283@cch.org.tw](mailto:156283@cch.org.tw)

2 School of Medicine, Chung Shan Medical University, Taichung, Taiwan

3 Institute of Genomics and Bioinformatics, National Chung Hsing University, Taichung, Taiwan

4 School of Medicine, Kaohsiung Medical University, Kaohsiung, Taiwan

5 Department of Medical Applied Chemistry, Chung Shan Medical University, Taichung, Taiwan; [withoutyou@hotmail.com.tw](mailto:withoutyou@hotmail.com.tw)

6 Department of Biomedical Sciences, Chung Shan Medical University, Taichung, Taiwan; [gqttw981@mail.ntust.edu.tw](mailto:gqttw981@mail.ntust.edu.tw)

7 Department of Medical Education, Chung Shan Medical University Hospital, Taichung, Taiwan

*Correspondence: changww@csmu.edu.tw (W.-W.C.); jrchu@csmu.edu.tw (C.-C.C.);
Tel.: +886-4-2473-0022-12317 (W.-W.C.); +886-4-2473-0022-12227 (C.-C.C.)

**Fig. S1**. XRD analysis of (a) core-shell and (b) core NaYF4 nanocrystals with α–phase (cubic) pattern.





| Element | Atomic % |
| --- | --- |
| F | 52 |
| Na | 14 |
| Y | 29 |
| Tm, Yb | 5 |

**Fig. S2**. EDXS analysis for the NaYF4 nanocrustals with successful Yb and Tm-doping.

**Fig. S3**. TGA analysis for (a) ligand-free, (b) oleate, and (c) citrate-modified upconversion nanoparticles (UCNPs).


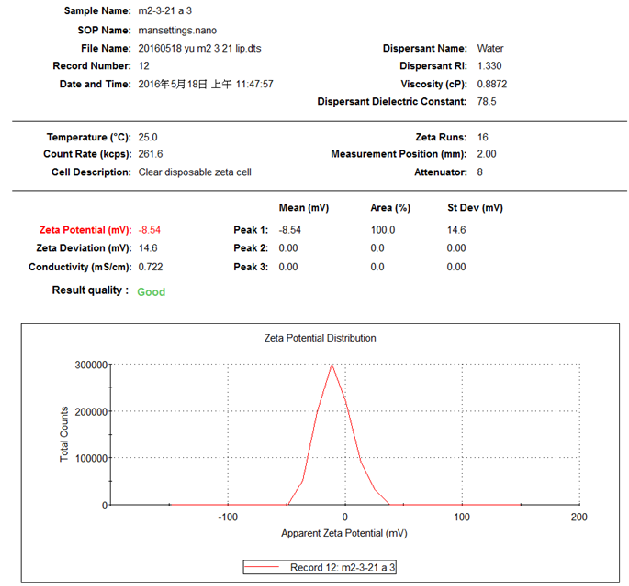


**(a)**


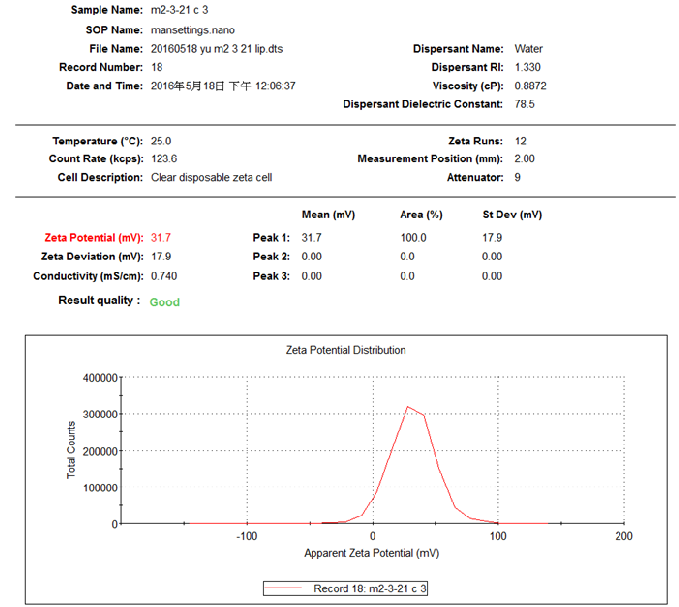


**(b)**


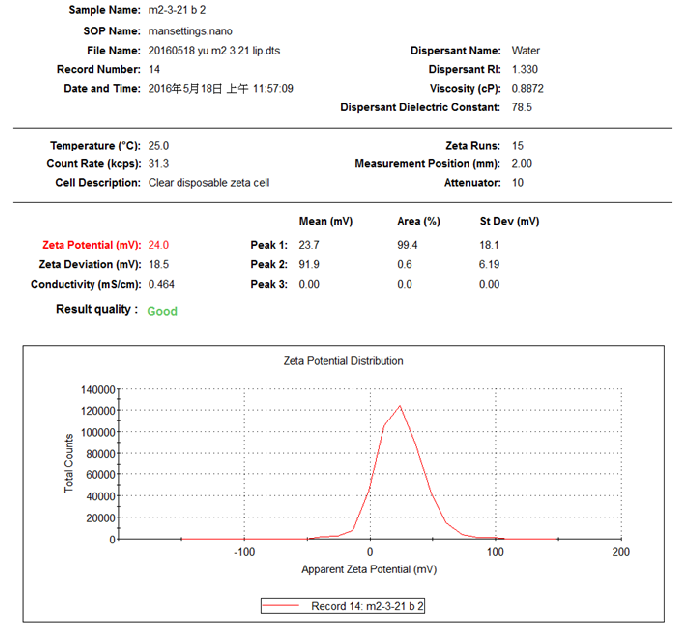


**(c)**

**Fig. S4**. Zeta potential measurements for UCNPs sequentially encapsulated with (**a**) citrate, **(b**) PAMAM dendrimer, and (**c**) chlorin e6 (Ce6).

**Fig. S5**. FT-IR analysis for (a) citrate and (b) PAMAM dendrimer-modified UCNPs. The arrows indicate the characteristic absorption bands of the surface functional groups.


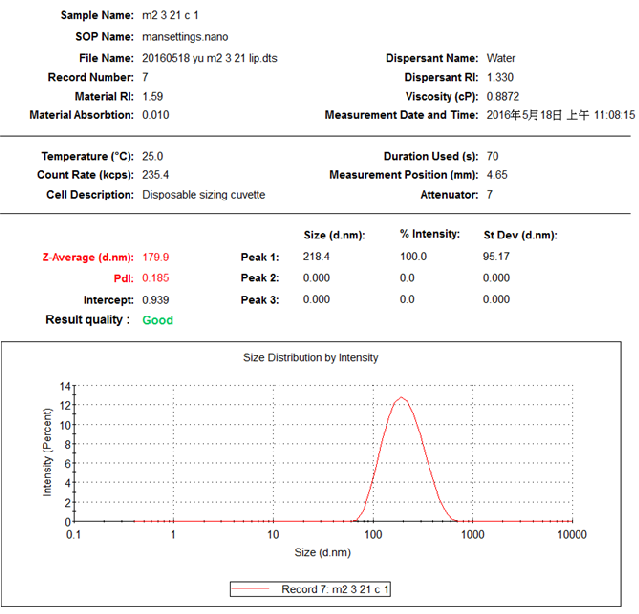


**Fig. S6**. Particle size distribution for PAMAM dendrimer-modified UCNPs.


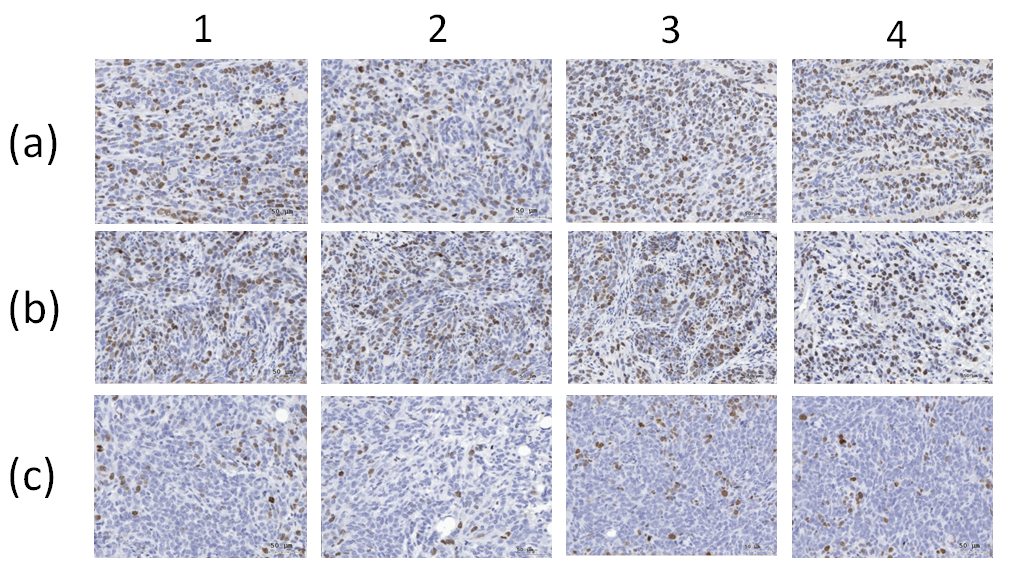


(d)


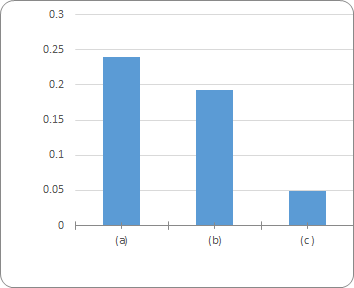


4.88%

19.3%

24.0%

**Fig. S7**. The Immunohistochemical (IHC) analysis of the tissue slices for Ki67 protein marker in four different fields. The tumors were treated with lower (7 g) and higher (21 g) dosage of the UCNPs combined with (+) and without (−) 980-m laser exposure: (**a**) 21 g/−; (**b**) 7 g/+; (**c**) 21 g/+. (**d**) The ratios of the positively stained cells for (**a**), (**b**), and (**c**) analyzed by manually counting the cells in the IHC images.


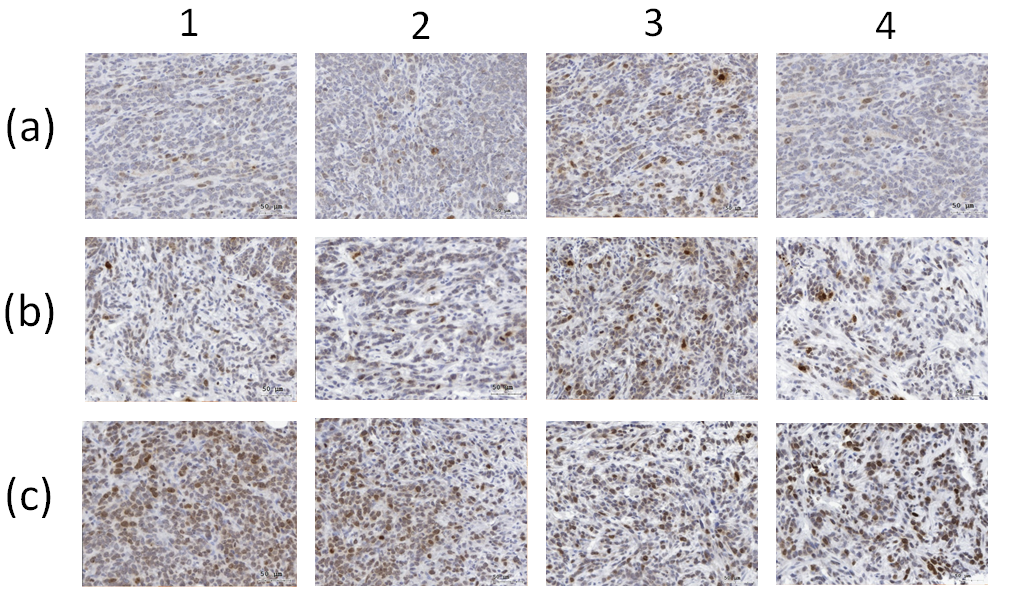


(d)


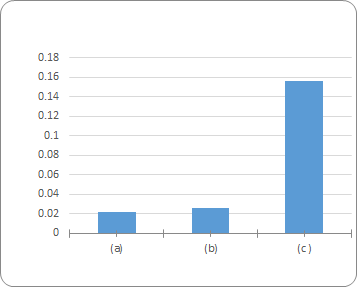


15.6%

2.55%

2.16%

**Fig. S8**. The Immunohistochemical (IHC) analysis of the tissue slices for γH2AXser139 protein marker in four different fields. The tumors were treated with lower (7 g) and higher (21 g) dosage of the UCNPs combined with (+) and without (−) 980-m laser exposure: (**a**) 21 g/−; (**b**) 7 g/+; (**c**) 21 g/+. (**d**) The ratios of the positively stained cells for (**a**), (**b**), and (**c**) analyzed by manually counting the cells in the IHC images.
